# Supplementary material
Source: PubMed Central journal article supplement (PMC3735449)
Supplement: NIHMS491399-supplement-10858_2013_9747_MOESM1_ESM.pdf [file NIHMS491399-supplement-10858_2013_9747_MOESM1_ESM.pdf]

# Supporting information

**Fast and accurate fitting of relaxation dispersion data using the flexible software package**

**GLOVE**

Kenji Sugase, Tsuyoshi Konuma, Jonathan C. Lansing, Peter E. Wright\*

In what follows, characters written in Courier New represent computational words used in the command lines, or GLOVE related files.

## **Installation**

### *Requirements*

- UNIX system (Linux, Intel-based Mac OSX, and Cygwin were tested)
- C++ compiler (g++ version 4.7.2 and Intel C++ compiler version 13.1.1 were tested)
- gfortran (<http://gcc.gnu.org/fortran/>)
- lapack (<http://www.netlib.org/lapack/>)
- blas (<http://www.netlib.org/blas/>)
- perl (<http://www.perl.org/>)
- grace (<http://plasma-gate.weizmann.ac.il/Grace/>)

Most of the programs and libraries required for GLOVE can be obtained using `yum` for Fedora Linux, `apt-get` for ubuntu Linux, or `port` for Mac OSX.

### *Environment variables*

The GLOVEDIR environment variable should point to the GLOVE directory. In the following example, the GLOVE directory, `glove2`, is located under user's home directory. For `csh` and `tcsh`, execute `source ~/.cshrc` after adding the following lines to the `.cshrc` file,

```
setenv GLOVEDIR ~/glove2
set path=($path $GLOVEDIR/bin)
```

For `bash`, execute `source ~/.bashrc` after adding the following lines to the `.bashrc` file.

```
export GLOVEDIR=~glove2
```

```
export PATH=$PATH:$GLOVEDIR/bin
```

### *Compilation*

The GLOVE executable binary is installed in `$GLOVEDIR/bin` by executing the following commands:

```
cd $GLOVEDIR
make install
```

### **Usage of GLOVE**

A typical usage of GLOVE and the description of valid options are shown below:

```
glove -i glove.in -o glove.out -v -xmgr
```

`-i` This option specifies the GLOVE input file, `glove.in`. Any file name can be used as long as the operating system allows it.

`-o` This option specifies the GLOVE output file, `glove.out`. Any file name can be used as long as the operating system allows it.

`-v` The reduced  $\chi^2$  value during the fit is reported on the monitor in real time.

`-xmgr` Graphical plots in the Xmgr format are created.

`-h` Valid options are shown.

`-d` This option specifies `glove.in` as the GLOVE input file and `glove.out` as the GLOVE output file, thus the options `-i` and `-o` are not necessary.

`-vv` The reduced  $\chi^2$  value during the fit are reported on the monitor in real time, and the fitting result is stored after each fitting method is finished.

`-noerr` Experimental errors are set to 1.0.

### **GLOVE input file**

A glove input file is composed of two sections: a header section (Supplementary Fig. 1), and a data set section (Supplementary Fig. 2). In what follows, we explain them in detail along with Supplementary Figs 1 and 2.

*Fitting Model (line 2 in Supplementary Fig. 1)*

The keyword `FUNCTION` specifies the fitting method (equation) to be used in the fit. `CPMG_RICHARDS` represents the Carver and Richards equation (Carver and Richards 1972) described in Theory and Methods. Other fitting methods implemented in GLOVE are explained in detail below.

*Fitting Method (lines 4-8 in Supplementary Fig. 1)*

The keyword `METHOD` specifies the fitting method(s) to be used in the fit. GLOVE has five fitting methods: `ONE`, `ONEEX`, `GRID`, `RANDOM`, and `MCMIN`. Here, we describe their usages in a GLOVE input file.

`ONE`, `ONEEX` and `GRID` require no optional parameter whereas `RANDOM` and `MCMIN` require the number of iterations. `MCMIN` further requires the scaling factor that defines the amplitude of random values to be added to the current best-fit parameter values. In the example shown in Supplementary Fig. 1, the fit starts with `RANDOM` with the number of iterations of 5, followed by three sequential `MCMIN` runs with the number of iterations of 5 and the scales of 0.1, 0.01, and 0.001, and the fit is finalized with `ONEEX`.

*Error Estimation (lines 10-11 in Supplementary Fig. 1)*

Standard deviations of fitting parameters are calculated using the covariance matrix method (Press et al. 2007) by default. Optionally, the jackknife and Monte Carlo methods (Press et al. 2007; Mosteller and Tukey 1968) can be used by specifying keywords `JACK` and `MONTE`, respectively. `JACK` requires no optional parameter whereas `MONTE` requires the number of calculations (100 in the case of Supplementary Fig. 1). Additional output files regarding their calculation results are generated. `JACK` and `MONTE` are conducted after a regular fit, and start from the best-fit parameter values determined by the fit as the initial values. Since the same fitting method(s) as the preceding fit are used for `JACK` and `MONTE` as well, the calculations often take extremely a long time, especially in the case of complicated models such as a three-state exchange model. Alternatively, GLOVE has simpler and faster versions of `JACK` and `MONTE` designated as `JACK1` and `MONTE1`, respectively. They use only the method `ONEEX`, which is a single point minimization from the initial values. Since each fitting parameter does not deviate much from its initial value (best-fit parameter value) during `JACK` and `MONTE` calculations, `ONEEX` is usually sufficient for the calculation of standard

deviations, and of course, it calculates much faster than does the full set of the fitting methods.

*Optional Calculation (lines 13-15 in Supplementary Fig. 1)*

GLOVE can optionally calculate parameters REX and PB, corresponding to an excess contribution caused by chemical exchange to an effective  $R_2$  rate,  $R_{ex}$  ( $= R_2^{eff}(1/\tau_{CP} = 50) - R_2^{eff}(1/\tau_{CP} = 100000)$ ), and the population of the minor state in a two-state exchange model,  $p_B$  ( $= (1 - \sqrt{1 - 4p_A p_B})/2$ ), respectively. The keyword CALC specifies what is to be calculated (REX or PB), followed by a label for the calculation, for example REX\_60.83MHz\_298.0K in Supplementary Fig. 1. This label is used in the GLOVE output file to show what was optionally calculated. The keyword CALC further requires experimental conditions and index numbers in the same manner as PLOT and DATA lines, shown as \* 298.0 1.00000 00, corresponding to  $1/\tau_{CP}$ , temperature, magnetic field, index numbers for the temperature and the magnetic field. In the cases of CALC and PLOT,  $1/\tau_{CP}$  is not necessary for their calculations, thus \* is used instead of a specific  $1/\tau_{CP}$  value. For temperature, it was shown that chemical shift difference  $\Delta\omega$  does not change at different temperatures (Palmer AG et al. 2001). Therefore, relaxation dispersion data collected at multiple temperatures can be fitted globally with  $\Delta\omega$  being treated as a global parameter. Since the model CPMG\_RICHARDS (the Carver and Richards equation) does not involve temperature for the calculation of the effective  $R_2$  rate, the temperature value is used to discriminate the experimental condition. For the magnetic field, GLOVE uses the relative magnetic field instead of the absolute magnetic fields. In Supplementary Fig.1, the relative magnetic fields of 1.0000 and 1.24953 correspond to  $^{15}\text{N}$  magnetic fields of 60.830911 and 76.010013 MHz, respectively. GLOVE calculates chemical shift differences  $\Delta\omega$  as DW multiplied by the relative magnetic field, and the fitted DW values are reported for the relative magnetic field of 1.0000, for example, 60.830911 MHz in this case. The two-digit index numbers 00 and 01 indicate that the first relaxation dispersion data were collected at 298.0 K (the left index number) and 60.83 MHz (the right index number), and the second ones were at 298.0 K and 76.01 MHz. Since both data were collected at the same temperature, they use the same left index number of 0. However, the magnetic fields are different, thus they use different right index numbers. For PB, the population of each state does not change with the magnetic field; therefore, it is calculated only for the relative magnetic field of 1.0000.

*Plot Instruction (lines 16-17 in Supplementary Fig. 1)*

The keyword `PLOT` specifies the relaxation dispersion profiles to be plotted on the Xmgr file as fitting results. `PLOT` is followed by a graph legend, experimental conditions, index numbers, the minimum and maximum  $1/\tau_{CP}$  values for which theoretical effective  $R_2$  rates are to be calculated, and the number of data points for the theoretical effective  $R_2$  rates. The experimental conditions and index numbers are the same as those used for `CALC`.

*XMGR Option (lines 20-27 in Supplementary Fig. 1)*

The statement starting with `@` specifies the properties of an Xmgr plot. In Supplementary Fig. 1, the minimum and maximum values of X (horizontal) and Y (longitudinal) axes, the major and minor tick spacing of X and Y axes are specified. The full lists of the Xmgr options are found on Grace user's guide (<http://plasma-gate.weizmann.ac.il/Grace/doc/UsersGuide.html>).

*Global Parameter (lines 29-30 in Supplementary Fig. 1)*

Global parameters must be declared before the data set section. A global parameter consists of a keyword `GPAR`, a label, lower and upper limits of a fitting parameter, and a grid size. The label is an identifier, and thus is not necessary to be the same as the fitting parameter name. In the data set section, the label of the global parameter substitutes for the lower and upper limits and the grid size of the fitting parameter that is treated as a global parameter, for example, shown on lines 3 and 4 in Supplementary Fig. 2. If they are treated as local parameters, they are specified as:

```
PAR KEX_0 5 4000 3
PAR PAPB_0 0.005 0.09 3
```

For the data sets (residues) that are involved in the same cluster as the data set of `SET 5-HN`, their fitting parameters `KEX_0` and `PAPB_0` are also modified in the same manner. If there are more than two clusters (more than two regions in a protein change their conformations at different rates), corresponding global parameter sets for `KEX_0` and `PAPB_0` must be declared in the header section.

The keyword `GPAR` is the global parameter version of `PAR`, which is a regular local parameter. The fitting parameters specified as `PAR` can go beyond the lower and upper limits during minimization. This is true for `GPAR` as well. To restrict a parameter within the user-defined range, the `GREST` parameter class, which is the global parameter version of `REST`, should be used instead of `GPAR`.

*Data Set Name (line 1 in Supplementary Fig. 2)*

The keyword SET specifies the data set name, for which the residue name or residue number is usually used.

*Fitting Parameters (line 2-6 in Supplementary Fig. 2)*

GLOVE has three different local parameters: PAR, REST, and FIXED. PAR is a regular local parameter, and is used like as:

```
PAR DW 100 2500 3
PAR KEX_0 50 4000 3
PAR PAPB_0 0.005 0.09 3
PAR R20_0_0 7.58
PAR R20_0_1 8.74
```

These are the same as what are shown in Supplementary Fig. 2 except that no global parameters are set. DW represents the chemical shift difference in units of  $\text{rad s}^{-1}$ , followed by the lower and upper limits, and the grid size. These values can differ among data sets. The upper limit and grid size can be omitted. If the grid size is omitted, it is automatically set to 2. If both the upper limit and grid size are omitted (the grid size must be omitted if the upper limit is to be omitted), the grid size is set to 1. By default, the parameter range is divided by the grid size with an equal distance; therefore, the parameter space is evaluated with no bias. Optionally, the parameter range can be divided by the distance calculated according to  $\exp(nx)$ ,  $\exp(-nx)$ ,  $\exp(n^2x^2)$ ,  $\exp(-n^2x^2)$ ,  $10^{nx}$ , or  $10^{-nx}$ .  $n$  ( $n > 0$ ) represents the  $n$  th grid point and  $x = (\text{parameter range})/(\text{grid size})$ . These dividing methods are specified by adding e, E, g, G, t, or T, respectively, right after the grid size without inserting a space. This option is useful for examining parameter values near the lower or upper limit more intensively than the opposite side without increasing the number of the grid size.

For the exchange rate, KEX, and the sum of the populations, PAPB, they have an index number (\_0) to discriminate the temperature at which the relaxation dispersions were measured. If another relaxation dispersion data were collected at a different temperature, the exchange rate and the populations can differ from KEX\_0 and PAPB\_0, thus KEX\_1 and PAPB\_1 should be added to the fitting parameter set. In practice, the program `cpmg2glove` automatically add fitting parameters and corresponding index numbers to the GLOVE input file if experimental conditions are correctly

provided. For the intrinsic relaxation rate,  $R_{20}$ , there are two index numbers ( $\_0\_0$  or  $\_0\_1$ ) to discriminate the temperature and the magnetic field, corresponding to the first and second index numbers, respectively, since the intrinsic relaxation rate depends upon both of them. Note that the upper limit and grid size for  $R_{20}$  are omitted because  $R_2^0$  is little dependent upon other parameters, and is not very sensitive to fitting models. In practice, the slowest  $R_2^{\text{eff}}$  rate in a relaxation dispersion profile is a good estimate as an initial value.

An initial value can optionally be specified after the grid size (neither the upper limit nor grid size should be omitted), for example,

```
PAR KEX_0 50 4000 3 250
```

In the case of the `PAR` class parameters, the optimized values can exceed beyond the user-defined upper and lower limits during fitting, but cannot exceed the hard-coded parameter limits that are written in the GLOVE source code, for instance, 1~12000 for `KEX`.

`REST` represents a restricted parameter class. It is similar to `PAR`, but each parameter value cannot exceed the user-defined lower or upper limit. The upper limit cannot be omitted in the case of `REST`, and the initial value must be specified within the upper and the lower limits, for example,

```
REST KEX_0 50 4000 3 250
```

`FIXED` represents a fixed parameter class. The parameter name is followed by a single value, which is not optimized in the fit, for example,

```
FIXED KEX_0 250
```

### **Glove output file**

A glove output file is composed of two sections: a header section and a result section (Supplementary Fig. 3). In what follows, we explain them along with Supplementary Fig 3. The header section reports the program version (line 1), the fitting model used in the fit (line 2), the fitting parameters for the model (line 3), the fitting methods (lines 4-9), the total data points (line 12), the total degree of freedom (line 13), the global reduced  $\chi^2$  value at each step of the fitting method (line 14-19), and the total time spent for the fit (line 20). Note that the fitting method `INIT` is always inserted in the beginning of the fitting methods by GLOVE. This method calculates the global reduced  $\chi^2$  value using the lower limits of the parameters or user-defined initial values.

The result section reports the data set name (line 22), fitted parameter values with standard

deviations in parentheses (lines 23-27), optionally calculated parameter values (lines 28-30), and the local reduced  $\chi^2$  value with the degree of freedom (line 31) for each data set.

## Fitting models

### *The Luz and Meiboom equation*

For the condition of fast exchange ( $k_{\text{ex}}/2 \gg \Delta\omega$ ), the Luz and Meiboom equation (Luz Z and Meiboom S 1963), called CPMG\_MEIBOOM in GLOVE, can be used:

$$R_2^{\text{eff}} = R_2^0 + \frac{p_A p_B \Delta\omega^2}{k_{\text{ex}}} \left[ 1 - \frac{2}{k_{\text{ex}} \tau_{\text{CP}}} \tanh\left(\frac{k_{\text{ex}} \tau_{\text{CP}}}{2}\right) \right] \quad (\text{S1}),$$

where  $p_A p_B \Delta\omega^2$  is a single fitting parameter, often represented as  $\Phi_{\text{ex}}$ . In GLOVE, the parameters  $k_{\text{ex}}$ ,  $p_A p_B \Delta\omega^2$ , and  $R_2^0$  are defined as KEX, PDW, and R20, respectively.

### *The Ishima and Torchia equation*

If the population is highly skewed to the major state, the Ishima and Torchia equation (Ishima R and Torchia DA 1999), called CPMG\_TORCHIA in GLOVE, can be used:

$$R_2^{\text{eff}} = R_2^0 + \frac{p_A p_B \Delta\omega^2 k_{\text{ex}}}{k_{\text{ex}}^2 + \sqrt{p_A^2 \Delta\omega^4 + 144 / \tau_{\text{CP}}^4}} \quad (\text{S2}).$$

In GLOVE, the parameters  $\Delta\omega$ ,  $k_{\text{ex}}$ ,  $p_A p_B$ , and  $R_2^0$  are defined as DW, KEX, PAPB, and R20, respectively.

### *Basic three-state exchange model*

An analytical equation was derived by Grey *et al.* for a three-state exchange model, but is only applicable to fast exchange (Grey MJ *et al.* 2003). Since it is difficult to know the exchange regime of the system of interest *a priori*, an  $R_2^{\text{eff}}$  rate in a three state exchange is usually calculated numerically by matrix operations (Korzhev DM *et al.* 2004):

$$R_2^{\text{eff}} (1 / \tau_{\text{CP}}) = -\frac{1}{T_{\text{CPMG}}} \ln\left(\frac{I(1 / \tau_{\text{CP}})}{I_0}\right) \quad (\text{S3}).$$

$$\mathbf{I}(1 / \tau_{\text{CP}}) = \left[ \exp\left(\mathbf{A} \frac{\tau_{\text{CP}}}{2}\right) \exp\left(\mathbf{A}^* \frac{\tau_{\text{CP}}}{2}\right) \exp\left(\mathbf{A} \frac{\tau_{\text{CP}}}{2}\right) \exp\left(\mathbf{A} \frac{\tau_{\text{CP}}}{2}\right) \right]^n \mathbf{I}(0)$$

The calculated  $R_2^{\text{eff}}$  rate using this matrix manipulation has no approximation for all exchange regimes, but the calculation is time consuming. To calculate  $R_2^{\text{eff}}$  faster in GLOVE, an  $R_2^{\text{eff}}$  rate is



calculated using the equation shown below. This equation called CPMG\_MATRIX3 in GLOVE was derived according to the same procedure to derive the Carver and Richards equation (Carver and Richards 1972):

$$R_2^{\text{eff}} = R_2^0 - \frac{1}{\tau_{\text{CP}}} \ln(\lambda_1) \quad (\text{S4}).$$

Under the experimentally accessible condition,  $R_2^{\text{eff}}$  is dominated by the largest eigenvalue  $\lambda_1$  of the matrix.

$$\begin{pmatrix} R \left[ \exp\left(-\mathbf{A} \frac{\tau_{\text{cp}}}{2}\right) \exp\left(-\mathbf{A}^* \frac{\tau_{\text{cp}}}{2}\right) \right] & I \left[ \exp\left(-\mathbf{A} \frac{\tau_{\text{cp}}}{2}\right) \exp\left(-\mathbf{A}^* \frac{\tau_{\text{cp}}}{2}\right) \right] \\ I \left[ \exp\left(-\mathbf{A} \frac{\tau_{\text{cp}}}{2}\right) \exp\left(-\mathbf{A}^* \frac{\tau_{\text{cp}}}{2}\right) \right] & -R \left[ \exp\left(-\mathbf{A} \frac{\tau_{\text{cp}}}{2}\right) \exp\left(-\mathbf{A}^* \frac{\tau_{\text{cp}}}{2}\right) \right] \end{pmatrix} \quad (\text{S5}),$$

where  $R[ ]$  and  $I[ ]$  are functions to extract the real or imaginary elements, respectively, of the complex matrix. As the matrix  $\mathbf{A}$  is a 3-by-3 evolution matrix as given below ( $\mathbf{A}^*$  is its complex conjugate), the matrix size shown as (S5) is 6-by-6 for the three-state exchange model. If the kinetic rate constants are much faster than differences in intrinsic relaxation rate between the states,  $\mathbf{A}$  is represented as:

$$\mathbf{A} = \begin{pmatrix} k_{\text{AB}} + k_{\text{AC}} & -k_{\text{BA}} & -k_{\text{CA}} \\ -k_{\text{AB}} & k_{\text{BA}} + k_{\text{BC}} - i\Delta\omega_{\text{AB}} & -k_{\text{CB}} \\ -k_{\text{AC}} & -k_{\text{BC}} & k_{\text{CB}} + k_{\text{CA}} - i\Delta\omega_{\text{AC}} \end{pmatrix} \quad (\text{S6}).$$

Note that the equation to derive eigenvalues becomes a sixth degree equation, but is a cubic equation of  $\lambda^2$ , therefore, it can be solved using Cardano's formula. In GLOVE, the parameters  $\Delta\omega_{\text{AB}}$ ,  $\Delta\omega_{\text{AC}}$ ,  $k_{\text{AB}}$ ,  $k_{\text{BA}}$ ,  $k_{\text{BC}}$ ,  $k_{\text{CA}}$ ,  $k_{\text{AC}}$ , and  $R_2^0$  are defined as DWAB, DWAC, KAB, KBA, KBC, KCA, KAC, and R20, respectively.  $k_{\text{CB}}$  is calculated according to the microscopic reversibility:  $k_{\text{CB}} = (k_{\text{AB}} \times k_{\text{BC}} \times k_{\text{CA}}) / (k_{\text{BA}} \times k_{\text{AC}})$ .

### Two-state binding models

Since the binding rate is dependent upon concentrations of two interacting molecules ( $\text{A} + \text{B} \xrightleftharpoons[k_{\text{off}}]{[\text{B}]k_{\text{on}}} \text{AB}$ ), a global analysis of relaxation dispersions measured with multiple concentration ratio samples provides binding kinetics  $k_{\text{on}}$  and  $k_{\text{off}}$ . The model called CPMG\_BIND2C in GLOVE is designed for the experiments in which the concentration of the NMR observable molecule is fixed for all samples whereas the concentration of the target molecule is varied, for example, 1:0.95, 1:1,

1:1.05, and 1:1.1. CPMG\_BIND2C utilizes the Richards and Carver equation with  $k_{\text{ex}} = [\text{B}]k_{\text{on}} + k_{\text{off}}$ .

The concentration of free B,  $[\text{B}]$ , is calculated according to:

$$[\text{B}] = \frac{1}{2} \left\{ -K_{\text{D}} - [\text{A}]_0 + a[\text{B}]_0 + \sqrt{(K_{\text{D}} + [\text{A}]_0 - a[\text{B}]_0)^2 + 4a[\text{B}]_0 K_{\text{D}}} \right\} \quad (\text{S7}),$$

where  $a$  is the concentration ratio of B between samples, for example, 0.95, 1, 1.05, 1.1.  $[\text{A}]_0$  and  $[\text{B}]_0$  represent the total concentrations of A and B, respectively, and the dissociation constant  $K_{\text{D}}$  is determined as  $K_{\text{D}} = k_{\text{off}}/k_{\text{on}}$ . In GLOVE,  $\Delta\omega$ ,  $k_{\text{on}}$ ,  $k_{\text{off}}$ ,  $R_2^0$ ,  $[\text{A}]_0$  and  $[\text{B}]_0$  are defined as DW, KON, KOFF, R20, A0, and B0, respectively.  $[\text{B}]_0$  is determined for the sample with the concentration ratio of 1.

In practice, this model is time-consuming to explore the best-fit parameter set, therefore, at the initial stage of the analysis, it is preferable to start with an easier model called CPMG\_BIND2, in which the fitting parameters are  $\Delta\omega$ ,  $Bk_{\text{on}}$ ,  $k_{\text{off}}$ , and  $R_2^0$ , defined as DW, BKON, KOFF, and R20, respectively, in GLOVE.  $Bk_{\text{on}}$  is a single fitting parameter in units of  $\text{s}^{-1}$ , substituted for  $[\text{B}]k_{\text{on}}$ . This fitting parameter is determined for each concentration ratio sample. The  $\Delta\omega$ ,  $k_{\text{off}}$ , and  $R_2^0$  values derived using this model can be good initial values in CPMG\_BIND2C.

### Three-state binding models

GLOVE has two distinct three-state binding models (CPMG\_BIND3C\_1F2B and CPMG\_BIND3C\_2F1B) utilizing the same matrix manipulation as CPMG\_MATRIX3 described above. CPMG\_BIND3C\_1F2B is comprised of one free and two bound states whereas CPMG\_BIND3C\_2F1B has two free and one bound states. Other three-state binding models can be constructed from either of the two models by fixing some parameters to zero. These two models are designed for the experiments in which the concentration of the NMR observable molecule is fixed for all samples whereas the concentration of the target molecule is varied. CPMG\_BIND3C\_1F2B can deal with the binding event in which a ligand binds to two binding sites on the target receptor with different affinities, or bound conformations, and the two bound conformations interconvert with each other. The matrix  $\mathbf{A}$  in CPMG\_MATRIX3 become as:

$$\mathbf{A} = \begin{pmatrix} [\text{B}](k_{\text{on1}} + k_{\text{on2}}) & -k_{\text{off1}} & -k_{\text{off2}} \\ -[\text{B}]k_{\text{on1}} & k_{\text{off1}} + k_{12} - i\Delta\omega_{\text{FB1}} & -k_{21} \\ -[\text{B}]k_{\text{on2}} & -k_{12} & k_{\text{off2}} + k_{21} - i\Delta\omega_{\text{FB2}} \end{pmatrix} \quad (\text{S8}),$$

where  $k_{\text{on1}}$  and  $k_{\text{off1}}$  ( $k_{\text{on2}}$  and  $k_{\text{off2}}$ ) represent the association and dissociation rate constants for the bound1 (bound2) state, respectively, and  $k_{12}$  and  $k_{21}$  are the rate constants for the chemical

(conformational) exchange from the bound1 to the bound2 state, and from the bound2 to the bound1 state, respectively.  $\Delta\omega_{FB1}$  and  $\Delta\omega_{FB2}$  represent the chemical shift differences between the free and bound1 states and between the free and bound2 states, respectively. The kinetic rates from the free to two bound states are concentration dependent, and  $[B]$  is calculated using Equation S7, but in this case, the dissociation constant  $K_D$  is calculated according to:

$$K_D = \frac{k_{\text{off1}}k_{\text{off2}} + k_{\text{off1}}k_{21} + k_{\text{off2}}k_{12}}{k_{\text{on1}}(k_{\text{off2}} + k_{12} + k_{21}) + k_{\text{on2}}(k_{\text{off1}} + k_{12} + k_{21})} \quad (\text{S9}).$$

In GLOVE, the parameters  $\Delta\omega_{FB1}$ ,  $\Delta\omega_{FB2}$ ,  $k_{\text{on1}}$ ,  $k_{\text{off1}}$ ,  $k_{\text{on2}}$ ,  $k_{\text{off2}}$ ,  $k_{12}$ ,  $k_{21}$ ,  $R_2^0$ ,  $[A]_0$  and  $[B]_0$  are defined as DWFB1, DWFB2, KON1, KOFF1, KON2, KOFF2, K12, K21, R20, A0, and B0, respectively.  $[B]_0$  is determined for the sample with the concentration ratio of 1. If  $k_{\text{on2}}$  and  $k_{\text{off2}}$  are fixed to 0 ( $k_{\text{on1}}$  and  $k_{\text{off1}}$  can alternatively be fixed to 0), the model becomes the induced fit model, in which there is a conformational change after binding:

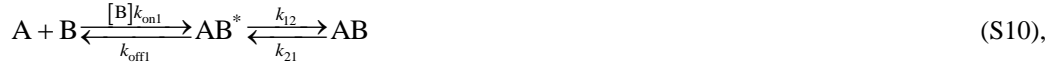

where  $AB^*$  and  $AB$  are the intermediate and the bound states, respectively. In this case, the rate constants  $k_{12}$  and  $k_{21}$  correspond to the folding and unfolding rate constants, respectively. If  $k_{12}$  and  $k_{21}$  are fixed to 0, CPMG\_BIND3C\_1F2B becomes the model in which a ligand binds to a receptor with two different bound conformations:

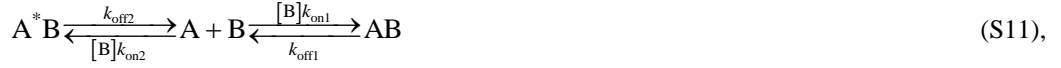

where  $AB$  and  $A^*B$  are the bound1 and the bound2 states, respectively.

On the other hand, the model CPMG\_BIND3C\_2F1B can deal with the binding event in which a ligand binds to a single binding site on the target receptor from two different free states, and the two free states interconvert with each other. The matrix  $\mathbf{A}$  in CPMG\_MATRIX3 become as:

$$\mathbf{A} = \begin{pmatrix} k_{12} + [B]k_{\text{on1}} & -k_{21} & -k_{\text{off1}} \\ -k_{12} & k_{21} + [B]k_{\text{on2}} - i\Delta\omega_{F1F2} & -k_{\text{off2}} \\ -[B]k_{\text{on1}} & -[B]k_{\text{on2}} & k_{\text{off1}} + k_{\text{off2}} - i\Delta\omega_{F1B} \end{pmatrix} \quad (\text{S12}),$$

where  $k_{12}$  and  $k_{21}$  are rate constant for the chemical (conformational) exchange from the free1 to the free2 state, and from the free2 to the free1 state.  $\Delta\omega_{F1F2}$  and  $\Delta\omega_{F1B}$  represent the chemical shift differences between the free1 and free2 states and between the free1 and bound states, respectively.  $[B]$  is obtained by solving the following cubic equation:

$$\begin{aligned}
& k_{\text{on1}}k_{\text{on2}}[\text{B}]^3 + \left[ ([\text{A}]_0 - [\text{B}]_0)k_{\text{on1}}k_{\text{on2}} + k_{\text{on1}}(k_{\text{off2}} + k_{21}) + k_{\text{on2}}(k_{\text{off1}} + k_{12}) \right] [\text{B}]^2 \\
& + \left[ ([\text{A}]_0 - [\text{B}]_0)(k_{\text{on1}}k_{21} + k_{\text{on2}}k_{12}) - [\text{B}]_0(k_{\text{on1}}k_{\text{off2}} + k_{\text{on2}}k_{\text{off1}}) + (k_{\text{off1}} + k_{\text{off2}})(k_{12} + k_{21}) \right] [\text{B}] \\
& - [\text{B}]_0(k_{\text{off1}} + k_{\text{off2}})(k_{12} + k_{21}) = 0
\end{aligned}
\tag{S13}$$

In GLOVE, the parameters  $\Delta\omega_{\text{F1F2}}$ ,  $\Delta\omega_{\text{F1B}}$ ,  $k_{\text{on1}}$ ,  $k_{\text{off1}}$ ,  $k_{\text{on2}}$ ,  $k_{\text{off2}}$ ,  $k_{12}$ ,  $k_{21}$ ,  $R_2^0$ ,  $[\text{A}]_0$  and  $[\text{B}]_0$  are defined as DWF1F2, DWF1B, KON1, KOFF1, KON2, KOFF2, K12, K21, R20, A0, and B0, respectively.  $[\text{B}]_0$  is determined for the sample with the concentration ratio of 1. If  $k_{\text{on1}}$  and  $k_{\text{off1}}$  are fixed to 0 ( $k_{\text{on2}}$  and  $k_{\text{off2}}$  can alternatively be fixed to 0), the model becomes the conformational selection model, in which there is a conformational change from the inactive form to the active form before binding:

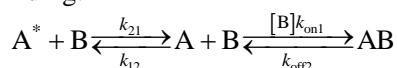

where  $\text{A}^*$  and  $\text{A}$  are the inactive and active conformations, respectively. The rate constants  $k_{21}$  and  $k_{12}$  correspond to the folding and unfolding rate constants, respectively.

### Utility programs contained in the GLOVE software package

#### *pkfit*

The program `pkfit` extracts chemical shifts and peak intensities from a series of relaxation dispersion spectra in the NMRView or NMRpipe format. It searches the highest peak position within a peak box defined in an NMRView `xpk` file, and obtains a sum of intensities at  $N \times N$  grid points centered on the peak top ( $N$  is an integer and usually  $N = 3$ ). Noise amplitudes are also extracted from noise floors specified in the same NMRView peak list, in which noises are assigned as 1.noise, 2.noise, ..., and  $N$ .noise ( $N \geq 10$ ). `pkfit` can be executed without signal assignment except for noise peaks as long as peaks of interest are correctly picked. Unassigned signals are represented as `N.tmp` ( $N$  represents the peak number) in GLOVE. A typical usage of `pkfit` and the description of valid options are shown below:

```
pkfit -i pkfit.in -o pkfit.out -v
```

- i This option specifies the `pkfit` input file, `pkfit.in`. Any file name can be used as long as the operating system allows it.
- o This option specifies the `pkfit` output file, `pkfit.out`. Any file name can be used as long as the operating system allows it.

- v           The process of `pkfit` is shown on the monitor.
- abs         All intensities except noise are obtained as absolute values.

Supplementary Figs 4 and 5 show examples of `pkfit` input and output files, respectively. It should be noted that `pkfit` determines the peak top positions accurately; therefore, it can also be used for determining the sign of  $\Delta\omega$  by comparing the chemical shifts between HSQC and HMQC spectra or between HSQC spectra collected at different magnetic fields.

#### *chop*

The program `chop` compiles peak intensities of each residue in a row from a `pkfit` output file, in which they are reported by the residue. The file created by `pkfit`, designated as an Int file, is subsequently used as an input file of the program `cpmg2glove`. A typical usage of `chop` and the description of valid options are shown below:

```
chop -i pkfit.out -int
```

- i           This option specifies the `pkfit` output file, `pkfit.out`. Any file name can be used as long as the operating system allows it.
- int         Intensities are extracted.

Other than intensities, `chop` can extract peak numbers, peak names, chemical shifts in the horizontal dimension, and chemical shifts in the vertical dimension by specifying `-num`, `-label`, `-pos1`, and `-pos2`, respectively, instead of `-int`. The name of the created Int file is `Int_XXXX`. `XXXX` is the magnetic field at which relaxation dispersion data were collected.

#### *pkfiti*

`pkfiti` is a shell script to execute `pkfit` and `chop` sequentially. The valid options for `pkfiti` are the same as those for `pkfit`.

#### *initval*

The program `initval` extracts the fitted parameter values from a GLOVE output file, and adds them to a new GLOVE input file as initial values. A typical usage of `initval` and the description of valid options are shown below:

```
initval -i glove.in -o glove.out > glove2.in
```

- i           This option specifies the GLOVE input file, `glove.in`. Any file name can be

- used as long as the operating system allows it.
- o This option specifies the GLOVE output file, `glove.out`. Any file name can be used as long as the operating system allows it.
  - ov The old GLOVE input file is overridden by the new GLOVE input file. Thus the option '`> glove2.in`' is not necessary.
  - h Valid options are shown.
  - d This option specifies `glove.in` as the GLOVE input file and `glove.out` as the GLOVE output file instead of using the options `-i` and `-o`.

### *mfit*

The program `mfit` runs `glove` multiple times with updating the GLOVE input file using `initval`. A typical usage of `mfit` is shown below:

```
mfit -i glove.in -o glove.out -n 10
```

The option `-n` specifies the number of repeats, and other options are the same as those for `glove`.

### *cpmg2glove*

The program `cpmg2glove` produces a GLOVE input file from Int files created by `chop` or `pkfitti`. A typical usage of `cpmg2glove` and the description of valid options are shown below.

```
cpmg2glove -t RICHARDS -i Int_76.01 298 > glove.in
```

- t This option specifies the fitting model.
- i This option specifies the Int file, `Int_76.01`, and the temperature at which relaxation dispersions were collected. Any file name can be used as long as the operating system allows it.

For the models, `CPMG_BIND2C`, `CPMG_BIND3C_1F2B`, and `CPMG_BIND3C_2F1B`, the option `-ic` is used instead of `-i` to specify the concentration ratio, corresponding to  $a$  in equation S7. Other valid options can be found by executing `cpmg2glove` with no arguments.

### *mplot*

The program `mplot` merges graphical plots of relaxation dispersion profiles created separately for each residue by GLOVE after the fit with the reduced size of the plots. `mplot` is typically used to merge all plots into a single PDF file by executing:

```
mplot -PDF
```

Other than the PDF format, mplot can produce PS, EPS, MIF, SVG, PNM, JPEG, PNG, and CGM files. Other valid options can be found by executing `'mplot -h'`.

## References

- Carver JP, Richards RE (1972) A general two-site solution for the chemical exchange produced dependence of  $T_2$  upon the Carr-Purcell pulse separation. *J Magn Reson* 6:89-105.
- Grey MJ, Wang C, Palmer AG (2003) Disulfide bond isomerization in basic pancreatic trypsin inhibitor: multisite chemical exchange quantified by CPMG relaxation dispersion and chemical shift modeling. *J Am Chem Soc* 125:14324-14335.
- Ishima R, Torchia DA (1999) Estimating the time scale of chemical exchange of proteins from measurements of transverse relaxation rates in solution. *J Biomol NMR* 14:369-372.
- Korzhnev DM, Salvatella X, Vendruscolo M, Di Nardo AA, Davidson AR, Dobson CM, Kay LE (2004) Low-populated folding intermediates of Fyn SH3 characterized by relaxation dispersion NMR. *Nature* 430:586-590.
- Luz Z, Meiboom S (1963) Nuclear magnetic resonance study of the protolysis of trimethylammonium ion in aqueous solution—order of the reaction with respect to solvent. *J Chem Phys* 39:366-370.
- Mosteller F, Tukey J (1968) Data analysis, including statistics. In: Lindzey G, Aronson E (eds) *Handbook of social psychology*, vol 2, 2nd edn. Addison-Wesley, Reading, pp 80-203.
- Palmer AG, Kroenke CD, Loria JP (2001) NMR methods for quantifying microsecond-to-millisecond motions in biological macromolecules. *Methods Enzymol* 339:204-238.
- Press WH, Teukolsky SA, Vetterling WT, Flannery BP (2007) *Numerical recipes 3rd edition: The art of scientific computing*. Cambridge University Press.



```

1 ##### Fitting Model #####
2 FUNCTION CPMG_RICHARDS
3 ##### Fitting Method #####
4 METHOD RANDOM 5
5 METHOD MCMIN 5 0.1
6 METHOD MCMIN 5 0.01
7 METHOD MCMIN 5 0.001
8 METHOD ONEEX
9 ##### Error Estimation #####
10 JACK
11 MONTE 100
12 ##### Optional Calculation #####
13 CALC REX REX_60.83MHz_298.0K * 298.0 1.00000 00
14 CALC REX REX_76.01MHz_298.0K * 298.0 1.24953 01
15 CALC PB PB_298.0K * 298.0 1.00000 00
16 ##### Plot Instruction #####
17 PLOT 60.83MHz_298.0K * 298.0 1.00000 00 50.0 3000.0 119
18 PLOT 76.01MHz_298.0K * 298.0 1.24953 01 50.0 3000.0 119
19 ##### XMGR Option #####
20 @ WORLD XMIN 0
21 @ WORLD XMAX 3000
22 @ XAXIS TICK MAJOR 500
23 @ XAXIS TICK MINOR 250
24 @ WORLD YMIN 0
25 @ WORLD YMAX 45
26 @ YAXIS TICK MAJOR 10
27 @ YAXIS TICK MINOR 5
28 ##### Global Parameter #####
29 GPAR KEX 5 4000 3
30 GPAR PAPB 0.005 0.09 3

```

**Supplementary Figure 1 A header section of a GLOVE input file.**

A line starting with # is a comment. Some comment lines inserted by the program `cpmg2glove` are omitted for clarity. The line numbers shown in light blue were added to guide the line(s) explained in the text, thus they are not necessary in an actual input file.

```

1 SET 5-HN
2 PAR DW 100 2500 3
3 PAR KEX_0 KEX
4 PAR PAPB_0 PAPB
5 PAR R20_0_0 7.58
6 PAR R20_0_1 8.74
7 DATA 100.00 298.0 1.00000 00 20.42862 0.35563
8 DATA 200.00 298.0 1.00000 00 18.20412 0.32535
9 DATA 300.00 298.0 1.00000 00 14.74989 0.28337
10 DATA 300.00 298.0 1.00000 00 15.04105 0.28669
11 DATA 400.00 298.0 1.00000 00 12.73597 0.26144
12 DATA 500.00 298.0 1.00000 00 11.21044 0.24596
13 DATA 600.00 298.0 1.00000 00 10.00580 0.23439
14 DATA 700.00 298.0 1.00000 00 9.58696 0.23049
15 DATA 800.00 298.0 1.00000 00 9.10373 0.22608
16 DATA 1000.00 298.0 1.00000 00 8.79323 0.22329
17 DATA 1000.00 298.0 1.00000 00 8.59268 0.22151
18 DATA 1200.00 298.0 1.00000 00 8.42577 0.22003
19 DATA 1400.00 298.0 1.00000 00 8.31555 0.21907
20 DATA 1600.00 298.0 1.00000 00 8.07264 0.21695
21 DATA 1800.00 298.0 1.00000 00 7.93837 0.21579
22 DATA 2000.00 298.0 1.00000 00 8.17706 0.21786
23 DATA 2000.00 298.0 1.00000 00 8.33593 0.21924
24 DATA 2500.00 298.0 1.00000 00 8.02470 0.21653
25 DATA 3000.00 298.0 1.00000 00 7.57790 0.21270
26 DATA 100.00 298.0 1.24953 01 23.56888 0.56658
27 DATA 200.00 298.0 1.24953 01 21.51731 0.52194
28 DATA 300.00 298.0 1.24953 01 18.56210 0.46375
29 DATA 300.00 298.0 1.24953 01 18.06511 0.45462
30 DATA 400.00 298.0 1.24953 01 15.64430 0.41267
31 DATA 500.00 298.0 1.24953 01 13.69360 0.38169
32 DATA 600.00 298.0 1.24953 01 13.30667 0.37583
33 DATA 700.00 298.0 1.24953 01 12.38000 0.36215
34 DATA 800.00 298.0 1.24953 01 10.96410 0.34221
35 DATA 1000.00 298.0 1.24953 01 10.28702 0.33307
36 DATA 1000.00 298.0 1.24953 01 10.84764 0.34062
37 DATA 1200.00 298.0 1.24953 01 10.41255 0.33474
38 DATA 1400.00 298.0 1.24953 01 10.52699 0.33628
39 DATA 1600.00 298.0 1.24953 01 9.24555 0.31948
40 DATA 1800.00 298.0 1.24953 01 9.22325 0.31919
41 DATA 2000.00 298.0 1.24953 01 9.23549 0.31935
42 DATA 2000.00 298.0 1.24953 01 9.69786 0.32531
43 DATA 2500.00 298.0 1.24953 01 9.92347 0.32826
44 DATA 3000.00 298.0 1.24953 01 8.73760 0.31305

```

**Supplementary Figure 2 A data set section of a GLOVE input file.**

The line numbers shown in light blue were added to guide the line(s) explained in the text, thus they are not necessary in an actual input file.

```

1 # GLOVE VERSION 2.3.5
2 MODEL CPMG_Richards
3 EQN f(dw, kex, papb, R20)
4 METHOD INIT
5 METHOD RANDOM 5
6 METHOD MCMIN 5 0.10
7 METHOD MCMIN 5 0.01
8 METHOD MCMIN 5 0.00
9 METHOD ONEEX
10
11 # Fitting results
12 # Total data points = 2090
13 # Total degrees of freedom (DoF) = 1923
14 # INIT X2/DoF = 88.7611
15 # RANDOM X2/DoF = 3.91054
16 # MCMIN X2/DoF = 1.45054
17 # MCMIN X2/DoF = 1.45054
18 # MCMIN X2/DoF = 1.45047
19 # ONEEX X2/DoF = 1.45047
20 # Fit duration 0h0m30s
21
22 SET 5-HN
23 DW 784.628 (0.15154)
24 KEX_0 600.292 (4.89726)
25 PAPB_0 0.034356 (0.000180275)
26 R20_0_0 7.75981 (22.0383)
27 R20_0_1 8.96904 (12.0833)
28 REX_60.83MHz_298.0K 12.8993
29 REX_76.01MHz_298.0K 15.1195
30 PB_298.0K 0.0356251
31 X2/DoF 1.3024 (DoF = 33)

```

**Supplementary Figure 3 An example of a GLOVE output file.**

The line numbers shown in light blue were added to guide the line(s) explained in the text, thus they are not shown in an actual output file.

```

# pkfit input file
FIELD                76.010013
BOXSIZE              1
PEAKLIST             test.xpk
TOLERANCE            10      10
SPECTRUM 750r2_1.ft2 0      0
SPECTRUM 750r2_2.ft2 0      0
SPECTRUM 750r2_3.ft2 0.04  100
SPECTRUM 750r2_4.ft2 0.04  200
SPECTRUM 750r2_5.ft2 0.04  300
SPECTRUM 750r2_6.ft2 0.04  300
SPECTRUM 750r2_7.ft2 0.04  400
SPECTRUM 750r2_8.ft2 0.04  500
SPECTRUM 750r2_9.ft2 0.04  600
SPECTRUM 750r2_10.ft2 0.04  700
SPECTRUM 750r2_11.ft2 0.04  800
SPECTRUM 750r2_12.ft2 0.04  1000
SPECTRUM 750r2_13.ft2 0.04  1000
SPECTRUM 750r2_14.ft2 0.04  1200
SPECTRUM 750r2_15.ft2 0.04  1400
SPECTRUM 750r2_16.ft2 0.04  1600
SPECTRUM 750r2_17.ft2 0.04  1800
SPECTRUM 750r2_18.ft2 0.04  2000
SPECTRUM 750r2_19.ft2 0.04  2000

```

**Supplementary Figure 4 An example of a `pkfit` input file.**

A line starting with # is a comment. `FIELD` is the magnetic field at which relaxation dispersion were collected. If relaxation dispersions were collected at multiple magnetic fields, the `pkfit` input file must be prepared for each of them. `BOXSIZE` determines the box size from which peak intensities are obtained. `BOXSIZE` of 1 corresponds to a  $3 \times 3$  box, 2 for  $5 \times 5$ , and 3 for  $7 \times 7$ . `PEAKLIST` specifies the NMRView `xpk` file. `TOLERANCE` specifies the ranges in which differences in the peak top position of each signal among a series of spectra are permitted. The ranges are specified for the horizontal and vertical dimensions of the 2D NMR spectra in units of Hz. `SPECTRUM` specifies a relaxation dispersion spectrum with  $T_{\text{CPMG}}$  and  $1/\tau_{\text{CP}}$  values.

```

FIELD (MHz) : 76.010013
SPECTRUM 1: 750r2_1.ft2
PARAMETERS: 0 0
# Num Label      Pos1      Pos2      Int
0  36.HN      10.1077   120.187   2.82754e+06
1  29.HN      9.93679   115.562   1.90427e+06
2  23.HN      9.63594   119.687   -1.92504e+06
3  19.HN      9.465     124.687   2.09456e+06
4  42.HN      9.30774   115.562   1.91047e+06
5  27.HN      9.23253   116.812   2.37208e+06
6  21.HN      9.19151   120.187   2.01295e+06
7  26.HN      9.14364   122.937   2.193e+06
8  28.HN      9.12313   126.687   2.35233e+06
9  46.HN      8.94536   122.937   2.82009e+06
10 44.HN      8.87015   117.312   3.06093e+06

:  :      :      :      :

56 1.noise  10.0872   117.562   -32073
57 2.noise  10.0188   124.062   -27747.7
58 3.noise  8.64451   118.937   -20059.1
59 4.noise  8.624     115.687   -51750.8
60 5.noise  6.81891   116.937   -30862.3
61 6.noise  7.05822   122.937   39349.8
62 7.noise  9.75218   127.187   34877.6
63 8.noise  8.72656   125.562   29051
64 9.noise  7.54368   125.937   -24599.5
65 10.noise 6.91463   128.312   -51846.8

```

**Supplementary Figure 5 An example of a `pkfit` output file.**

A line starting with # is a comment. FIELD is the magnetic field at which relaxation dispersion are collected. SPECTRUM shows the spectrum number and its name. PARAMETERS report  $T_{CPMG}$  and  $1/\tau_{CP}$  values specified by the line starting SPECTRUM in the `pkfit` input file (Supplementary Fig. 4). The rest of the part reports the peak numbers, peak names, chemical shifts of the horizontal and vertical dimensions, and intensities for each spectrum.

**Table S1. Validation of the fitting protocol using synthetic data including 5% random noise**

| fitting parameter | input   | output <sup>c</sup> |
|-------------------|---------|---------------------|---------|---------------------|---------|---------------------|---------|---------------------|---------|---------------------|
| $k_{ex}^a$        | 500     | 503                 | 1000    | 1002                | 1500    | 1513                | 2000    | 2015                | 2500    | 2497                |
| $p_B^a$           | 0.02000 | 0.01987             | 0.02000 | 0.02002             | 0.02000 | 0.01995             | 0.02000 | 0.01993             | 0.02000 | 0.02005             |
| $\Delta\omega^b$  | 500     | 492                 | 500     | 502                 | 500     | 491                 | 500     | 501                 | 500     | 497                 |
|                   | 1000    | 1003                | 1000    | 993                 | 1000    | 1002                | 1000    | 1005                | 1000    | 1000                |
|                   | 1500    | 1501                | 1500    | 1491                | 1500    | 1507                | 1500    | 1505                | 1500    | 1496                |
|                   | 2000    | 2016                | 2000    | 1990                | 2000    | 1992                | 2000    | 2005                | 2000    | 1992                |
|                   | 2500    | 2510                | 2500    | 2510                | 2500    | 2498                | 2500    | 2508                | 2500    | 2489                |

<sup>a</sup> Global parameter.

<sup>b</sup> Local parameter.

<sup>c</sup> The best-fit parameter values using the combined method RANDOM+MCMIN+ONEEX.
